# Supplementary material for: Over-Expression of Rose RrLAZY1 Negatively Regulates the Branch Angle of Transgenic Arabidopsis Inflorescence
Source: MDPI journal article supplement (doi:10.3390/ijms222413664), 2021-12-20
Supplement: s1 [file s1]

## Supplementary material

**Table S1. Primer sequences of related genes used in the study.**

| Gene            | Primer name | Sequence (5'-3')               | Description                                                       |
|-----------------|-------------|--------------------------------|-------------------------------------------------------------------|
| <i>RrLAZY1</i>  | LA-F        | ATGAAGTTACTGGGATGGATGC         | cDNA full-length<br>amplification primers                         |
|                 | LA-R        | TCACAGCTCCAGGACTAGGTAGT        |                                                                   |
| <i>RrIAA4</i>   | IAA4-F      | ATGGCTTCCAAGCAGAGG             |                                                                   |
|                 | IAA4-R      | TCACCCGCACAACCTAAG             |                                                                   |
| <i>RrPIN7</i>   | PIN7-F      | ATGGGTTTCTGGACTCTGC            |                                                                   |
|                 | PIN7-R      | TCAAGACAAGATCCACATGTAG         |                                                                   |
| <i>RrPID</i>    | PID-F       | ATGTTAGAGCTTGGTCCGATTAG        |                                                                   |
|                 | PID-R       | TCAAAAGTAATCGAACGCC            |                                                                   |
| <i>RrIAA16</i>  | IAA16-F     | ATGACCAGTACTGCTGCTATGG         |                                                                   |
|                 | IAA16-R     | TCAACTTCTGTTCTTGAACCTCTCC      |                                                                   |
| <i>RrLAZY1</i>  | LA+S-F      | ACTAGTATGAAGTTACTGGGATGGATGC   | Primers for<br>over-expression vector<br>construction             |
|                 | LA+B-R      | GGTCACCTCACAGCTCCAGGACTAGGTAGT |                                                                   |
| <i>RrLAZY1</i>  | QA-F        | TCTTGCAGGCCAGCCATCAC           | Fluorescence<br>quantitative primers                              |
|                 | QA-R        | AGATGCCGCAGCAGAGGATT           |                                                                   |
| <i>RrGAPDH</i>  | GAPDH-F     | TGAAGGGTGGTGCCAAGAA            |                                                                   |
|                 | GAPDH-R     | AAGGGGAGCAAGACAGTTGG           |                                                                   |
| <i>AtPIN1</i>   | QPIN1-F     | TCACACCAGACCAATGCTCC           | Quantitative PCR<br>primers for<br>Arabidopsis<br>over-expression |
|                 | QPIN1-R     | TCTAAAGAACCGTTGCGGCT           |                                                                   |
| <i>AtPIN3</i>   | QPIN3-F     | GCCTCGAGTGAGCATCACA            |                                                                   |
|                 | QPIN3-R     | GCGCCACGAACTCGAAGAG            |                                                                   |
| <i>AtPIN5</i>   | QPIN5-F     | CTATTTACCCTGCCGCTCT            |                                                                   |
|                 | QPIN5-R     | CCACAACGCTAAGACCGTGA           |                                                                   |
| <i>AtAUX1</i>   | QAUX1-F     | GGAAAGCACTAGGACTCGCA           |                                                                   |
|                 | QAUX1-R     | TGGCACAAGCAATGAGTTGG           |                                                                   |
| <i>AtABCB19</i> | QABCB19-F   | GGTGCTTACGCATCCCTCAT           |                                                                   |
|                 | QABCB19-R   | AGTGAATGGCTCAAACGGGT           |                                                                   |

|                |           |                                  |                                                                                   |
|----------------|-----------|----------------------------------|-----------------------------------------------------------------------------------|
| <i>AtIAA6</i>  | QIAA6-F   | GAAGAGTCAAGCGGTGGGAT             | Primers used in the construction of bimolecular fluorescent complementary vectors |
|                | QIAA6-R   | GCCACTCCTATGCCAAGACA             |                                                                                   |
|                | QACT-F    | TCTCTATGCCAGTGGTCGTA             |                                                                                   |
|                | QACT-R    | CCTCAGGACAACGGAATC               |                                                                                   |
| <hr/>          |           |                                  |                                                                                   |
| <i>RrIAA4</i>  | IAA4+N-F  | ACTAGTATGGCTTCCAAGCAGAGG         |                                                                                   |
|                | IAA4+N-R  | CTCGAGCCCGCACAACTAAG             |                                                                                   |
| <i>RrPIN7</i>  | PIN7+N-F  | ACTAGTATGGGTTTCTGGACTCTGC        |                                                                                   |
|                | PIN7+N-R  | AGTACTAGACAAGATCCACATGTAG        |                                                                                   |
| <i>RrPID</i>   | PID+N-F   | GGATCCATGTTAGAGCTTGGTCCGATTAG    |                                                                                   |
|                | PID+N-R   | CTCGAGAAAGTAATCGAACGCC           |                                                                                   |
| <i>RrIAA16</i> | IAA16+N-F | GGCGCGCCATGACCAGTACTGCTGCTATGG   |                                                                                   |
|                | IAA16+N-R | CTCGAGACTTCTGTTCTTGAACCTTCTCC    |                                                                                   |
| <i>RrLAZY1</i> | LA+C-F    | ACTAGTATGAAGTTACTGGGATGGATGC     |                                                                                   |
|                | LA+C-R    | CTCGAGCAGCTCCAGGACTAGGTAGT       |                                                                                   |
| <hr/>          |           |                                  |                                                                                   |
| <i>RrLAZY1</i> | LA+B-F    | GAATTCATGAAGTTACTGGGATGGATGC     |                                                                                   |
|                | LA+B-R    | GGATCCTCACAGCTCCAGGACTAGGTAGT    |                                                                                   |
| <i>RrIAA4</i>  | IAA14+A-F | CATATGATGGCTTCCAAGCAGAGG         |                                                                                   |
|                | IAA14+A-R | CTCGAGTCACCCGCACAACCTAAG         |                                                                                   |
| <i>RrPID</i>   | PID+A-F   | GGATCCATGTTAGAGCTTGGTCCGATTAG    |                                                                                   |
|                | PID+A-R   | CTCGAGTCAAAAGTAATCGAACGCC        |                                                                                   |
| <i>RrPIN7</i>  | PIN7+A-F  | CATATATGGGTTTCTGGACTCTGC         |                                                                                   |
|                | PIN7+A-R  | GGATCCTCAAGACAAGATCCACATGTAG     |                                                                                   |
| <i>RrIAA16</i> | IAA16+A-F | CATATGATGACCAGTACTGCTGCTATGG     |                                                                                   |
|                | IAA16+A-R | CTCGAGTCAACTTCTGTTCTTGAACCTTCTCC |                                                                                   |
| <hr/>          |           |                                  |                                                                                   |
| <i>RrLAZY1</i> | A+Y-F     | CCATGGATGAAGTTACTGGGATGGATGC     | Primers for subcellular localization vector construction                          |
|                | A+Y-R     | ACTAGTCAGCTCCAGGACTAGGTAGT       |                                                                                   |
